# Supplementary material
Source: PubMed Central journal article supplement (PMC5385428)
Supplement: Supp_Fig1.pdf [file Supp_Fig1.pdf]

## Supplementary Data

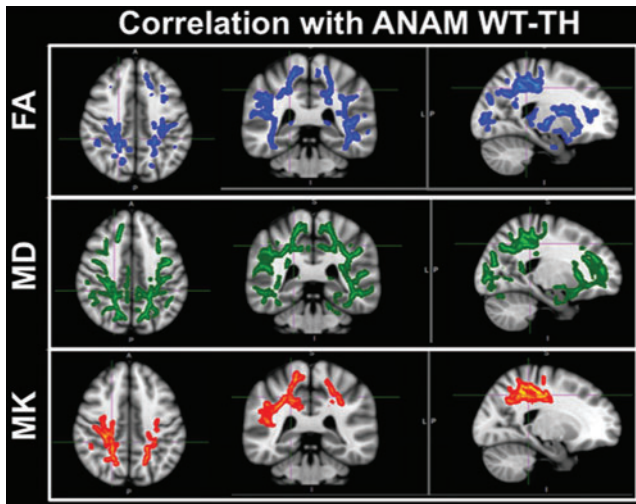

**SUPPLEMENTARY FIG. 1.** Tract Based Statistics map for disrupted white matter regions that showed significant individual correlations between each of the three diffusion kurtosis imaging parameters (fractional anisotropy [FA], mean diffusivity [MD], and mean kurtosis [MK]) and the cognitive score (Automated Neuropsychological Assessment Metrics weighted throughput score [ANAM WT-TH]) within the severe and moderate traumatic brain injury population ( $n = 19$ ).
